# Supplementary material for: Effect of platinum electrode materials and electrolysis processes on the preparation of acidic electrolyzed oxidizing water and slightly acidic electrolyzed water
Source: Royal Society of Chemistry journal article supplement (doi:10.1039/c8ra08929a), 2019-01-01
Supplement: c8ra08929a1.pdf [file c8ra08929a1.pdf]

### **Electronic Supplementary Information**

#### **Effect of platinum electrode material and electrolysis process on the preparation of acidic electrolyzed oxidizing water and slightly acidic electrolyzed water**

Xiang Song, Hui Zhao, Keneng Fang, Yongshan Lou, Zongkui Liu, Chifeng Liu,  
Zhandong Ren,\* Xiaorong Zhou, Hua Fang and Yuchan Zhu\*

School of Chemical and Environmental Engineering, Wuhan Polytechnic University,  
Wuhan, 430023, P. R. China.

E-mail: renzhandong@163.com, zhuyuchan@163.com

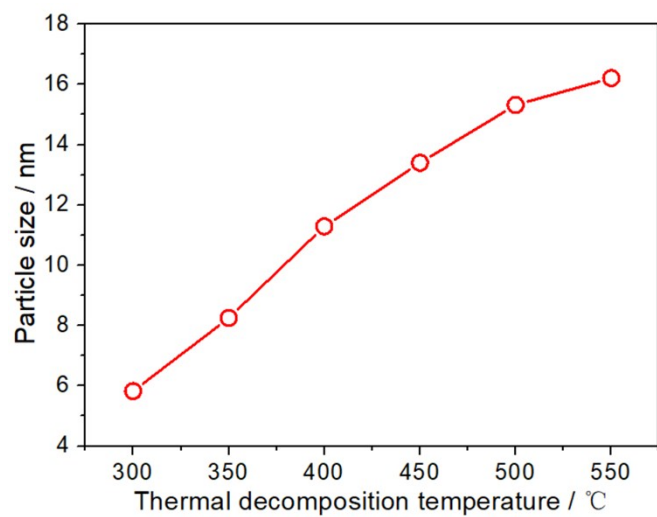

Figure S1 Particle size of Pt electrodes with different thermal decomposition temperatures.

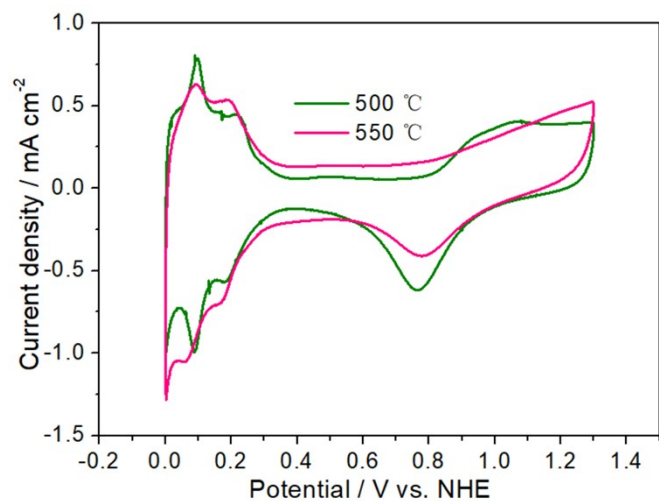

Figure S2 Cyclic voltammogram for Pt electrodes with thermal decomposition temperature 500 °C and 550 °C.

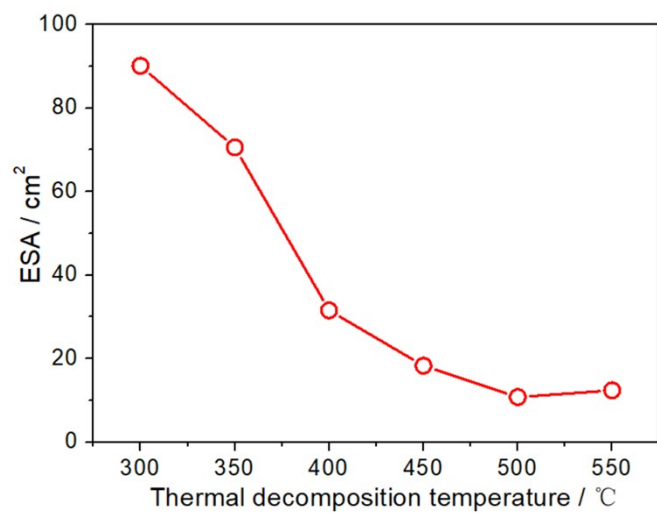

Figure S3 Electrochemical surface area (ESA) of Pt electrodes with different thermal decomposition temperatures.

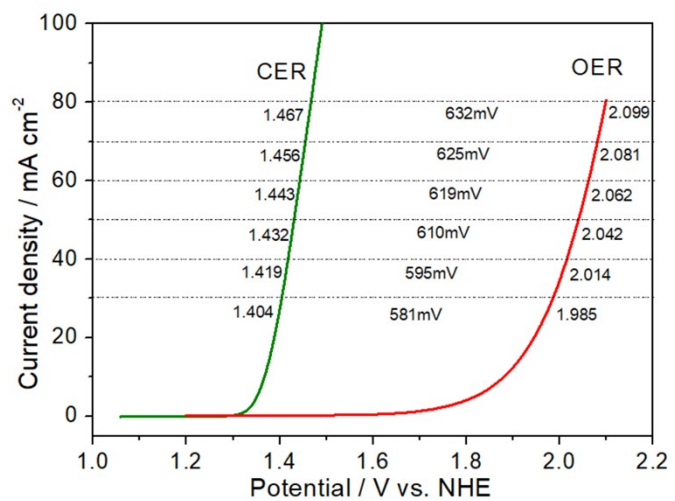

Figure S4 The potential difference between CER and OER ( $\Delta E_{\text{CER-OER}}$ ) with different current density
